# Supplementary material for: Boosted Catalytic Activity toward the Hydrolysis of Ammonia Borane by Mixing Co- and Cu-Based Catalysts
Source: MDPI journal article supplement (doi:10.3390/catal12040426), 2022-04-11
Supplement: s1 [file s1]

## Supplementary Materials

### Boosted catalytic activity toward the hydrolysis of ammonia borane by mixing Co- and Cu-based catalysts

Jinyun Liao <sup>1,2,#</sup>, Yujie Wu <sup>1,#</sup>, Yufa Feng <sup>2</sup>, Haotao Hu <sup>2</sup>, Lixuan Zhang <sup>2</sup>, Jingchun Qiu <sup>2</sup>, Junhao Li <sup>1</sup>,  
Quanbing Liu <sup>1,\*</sup>, Hao Li <sup>2,\*\*</sup>

<sup>1</sup> School of Chemical Engineering and Light Industry, Guangdong University of Technology, Guangzhou 510006, China

<sup>2</sup> School of Chemistry and Materials Engineering, Guangdong Provincial Key Laboratory for Electronic Functional Materials and Devices, Huizhou University, Huizhou 516007, China

# Both authors contribute equally to this work.

\* Correspondence: liuqb@gdut.edu.cn (Q.L.); lihao180@126.com (H.L.); Tel.: +86-752-2527229 (H.L.)

#### Experimental Section

**Preparation of Co<sub>3</sub>(PO<sub>4</sub>)<sub>2</sub> microsphere.** A mixture solution of 1.5 mmol CoSO<sub>4</sub>·7H<sub>2</sub>O (Aladdin, ≥99%) was prepared in 2.7 mL of deionized water with stirring. Next, 135 μL of a H<sub>3</sub>PO<sub>4</sub> (Aladdin, ≥85%) solution (30%) was dropwise added to the CoSO<sub>4</sub> solution. Then, the obtained solution is poured into a mixture solution (61.3 mL) containing 0.67 mmol sodium dodecyl sulfate (SDS, Tianjin Baishi Chemical Reagent Co. Ltd., AR) and 67 mmol urea (Tianjin Yongda Chemical Reagent Co. Ltd., ≥99%). The obtained solution was hydrothermally heated at 120 °C for 2 h. Subsequently, the resultant sample was rinsed with ethanol and deionized water. Then, the product was dried in oven at 80 °C for 6 h.

**Preparation of flower-like Cu<sub>3</sub>(PO<sub>4</sub>)<sub>2</sub>·3H<sub>2</sub>O.** A mixture solution of 0.9 mmol SDS (Tianjin Baishi Chemical Reagent Co. Ltd., AR) and 100 mmol urea (Tianjin Yongda Chemical Reagent Co. Ltd., ≥99%) was mixed with a mixture solution of 24 mL deionized water and 40 mL isopropyl alcohol (IPA, Taishan Yueqiao Reagent Plastic Co. Ltd., >99.7%) with stirring. Then, 8 mL of a 0.063 M CuSO<sub>4</sub>·5H<sub>2</sub>O (Tianjin Baishi

Chemical Co. Ltd.,  $\geq 99\%$ ) solution was added into the above solution. After stirring for 30 min, 135  $\mu\text{L}$  of a  $\text{H}_3\text{PO}_4$  (Aladdin,  $\geq 85\%$ ) solution (30%) was slowly added into the mixed solution. Then, after stirring for another 30 min, the final mixture solution was hydrothermally heated at 100  $^\circ\text{C}$  for 2 h. After the reaction, the final product was thoroughly rinsed with deionized water and ethanol. Then, the product was dried in an oven at 60  $^\circ\text{C}$  for 24 h.

**Preparation of rod-shape  $\text{CuO}$ .** A solution of 3 mmol  $\text{CuCl}_2$  (Taishan Yueqiao Reagent Plastic Co. Ltd., Jiangmen, China,  $>99.0\%$ ) was prepared in 20 mL of deionized water with stirring. Then, 20 mL of a 0.1 M  $\text{Na}_3\text{PO}_4$  (Taishan Yueqiao Reagent Plastic Co. Ltd., Jiangmen, China,  $>98.0\%$ ) solution was added dropwise into the above solution with stirring for 30 min. Subsequently, 20 mL of a mixture solution of 0.1 M SDS (Tianjin Baishi Chemical Reagent Co. Ltd., Tianjin, China, AR) and 0.3 M sodium salicylate ( $\text{C}_7\text{H}_5\text{NaO}_3$ , Tianjin Damao Chemical Reagent Co. Ltd., Tianjin, China,  $>99.5\%$ ) was added into the above mixture solution. After stirring for another 30 min, 20 mL of 5 M  $\text{NaOH}$  (Taishan Yueqiao Reagent Plastic Co. Ltd., Jiangmen, China,  $>96.0\%$ ) solution was slowly added into the mixed solution. Eventually, after stirring for another 30 min, the mixture solution was hydrothermally heated at 150  $^\circ\text{C}$  for 8 h. After the reaction, the final product was rinsed with deionized water and ethanol. Then, the product was dried in an oven at 80  $^\circ\text{C}$  for 6 h.

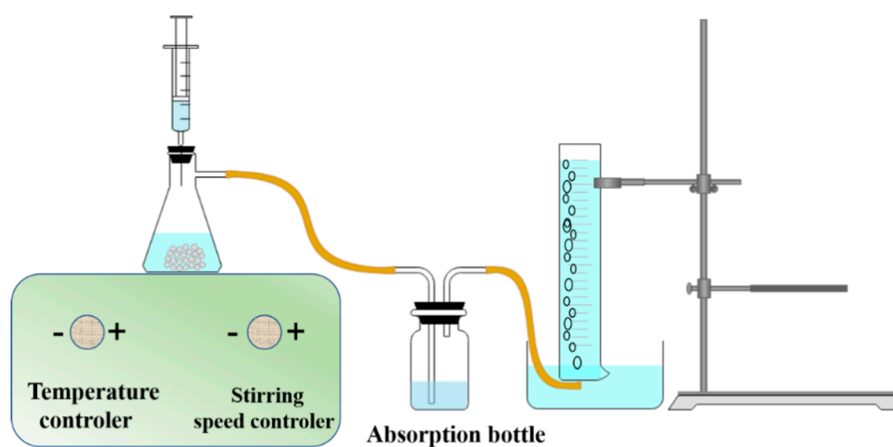

Figure S1 Illustration of the set-up for the hydrolysis experiments.

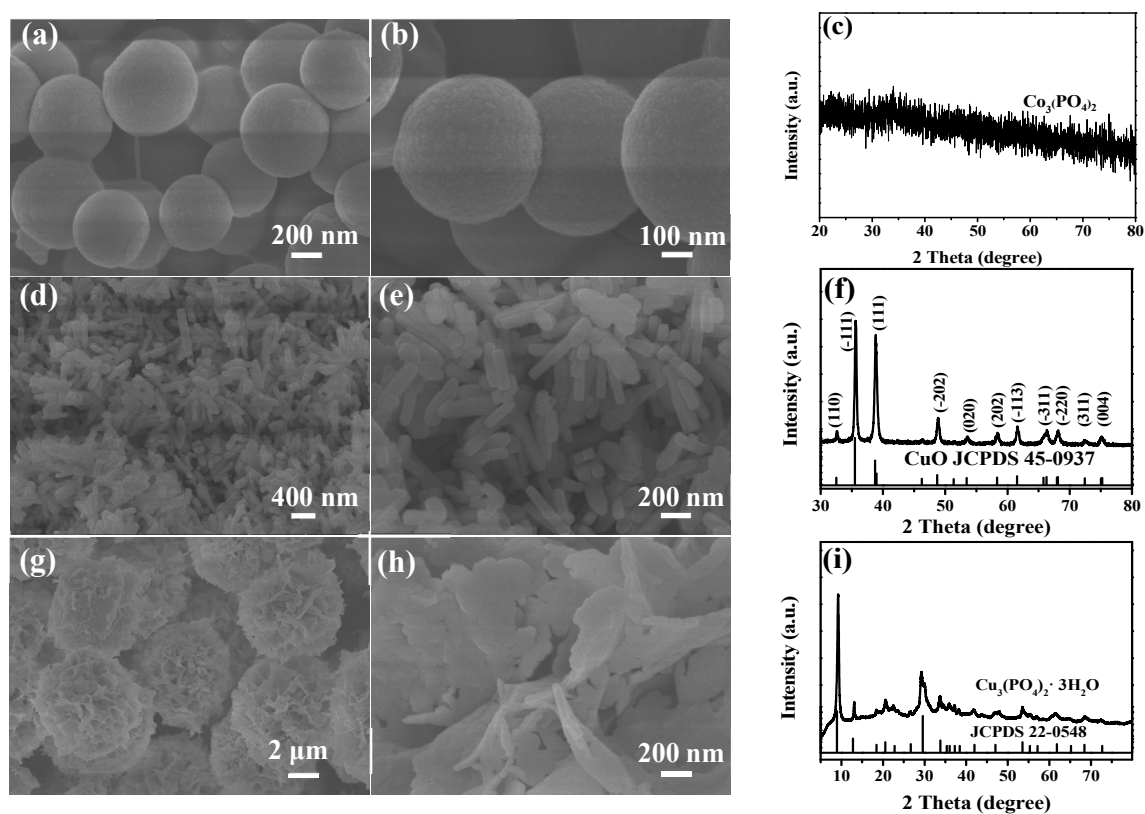

Figure S2 SEM images of  $\text{Co}_3(\text{PO}_4)_2$  (a, b),  $\text{CuO}$  (d, e) and  $\text{Cu}_3(\text{PO}_4)_2 \cdot 3\text{H}_2\text{O}$  (g, h), and XRD patterns of  $\text{Co}_3(\text{PO}_4)_2$  (c),  $\text{CuO}$  (f) and  $\text{Cu}_3(\text{PO}_4)_2 \cdot 3\text{H}_2\text{O}$  (i).

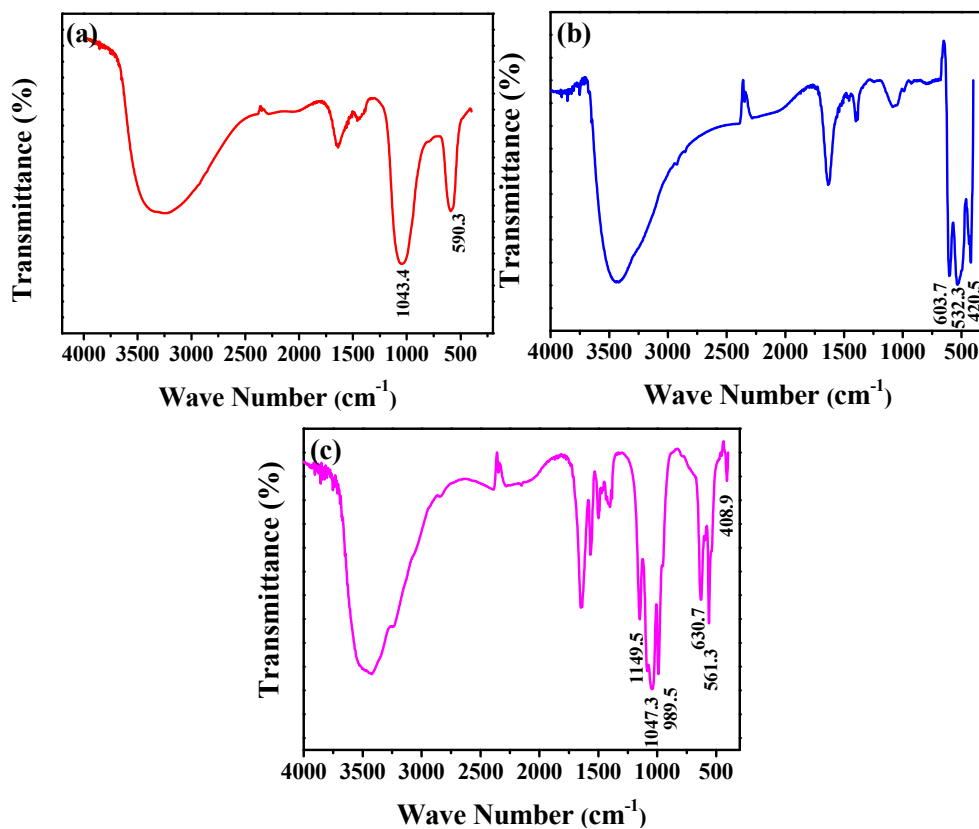

Figure S3. FT-IR spectrum of  $\text{Co}_3(\text{PO}_4)_2$  (a),  $\text{CuO}$  (b) and  $\text{Cu}_3(\text{PO}_4)_2$  (c).

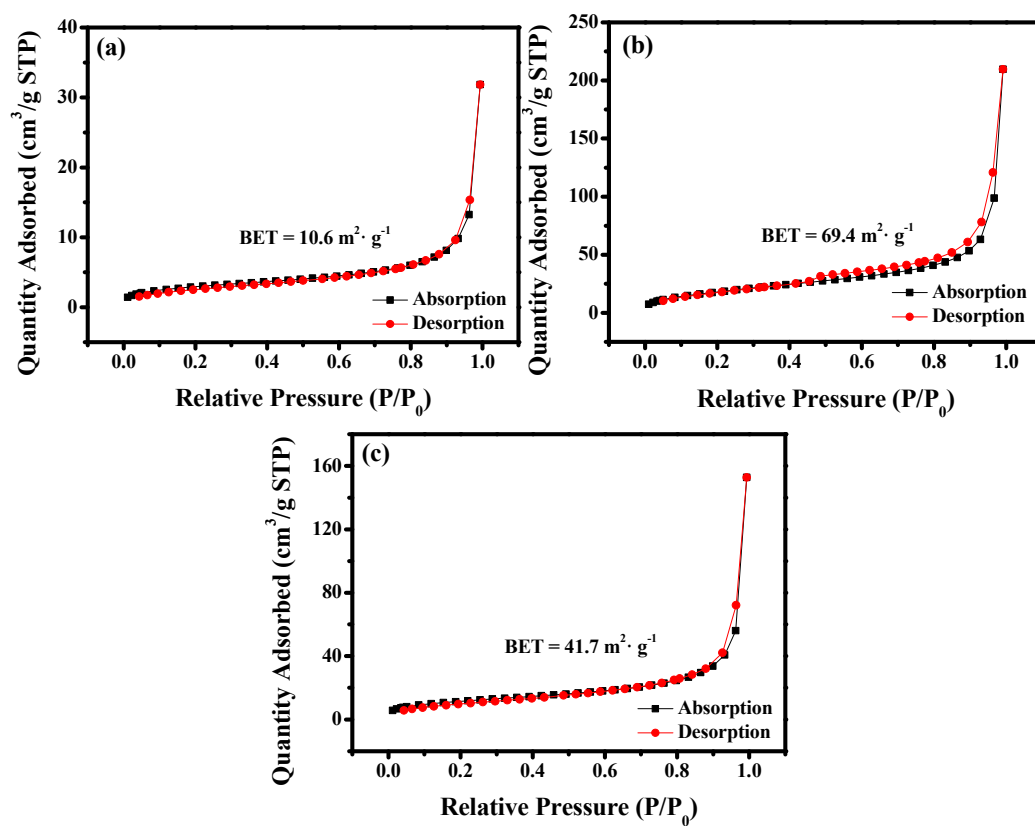

Figure S4.  $\text{N}_2$  adsorption-desorption isotherms of  $\text{CuO}$  (a),  $\text{Co}_3(\text{PO}_4)_2$  (b) and  $\text{Cu}_3(\text{PO}_4)_2$  (c).

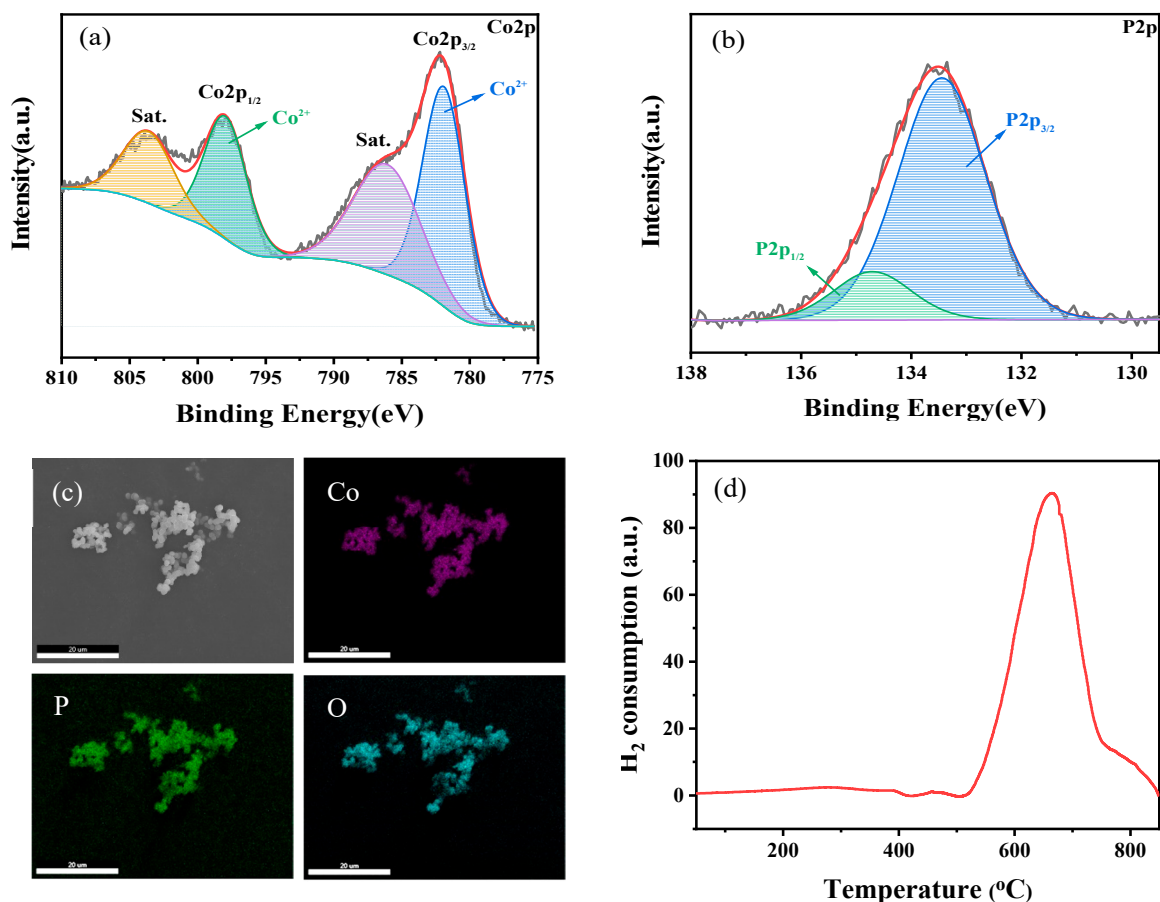

Figure S5. XPS spectra in Co 2p and P 2p regions (a, b), elemental mapping (c) and H<sub>2</sub>-TPR profile (d) of Co<sub>3</sub>(PO<sub>4</sub>)<sub>2</sub>.

In Figure S5a and 4b, the peaks at 798.1 and 782.0 eV are attributed to the Co2p 1/2 and Co2p 3/2 states of Co 2p, respectively. The peaks at 134.2 and 133.3 eV are indexed to P2p 1/2 and P2p 3/2 of the phosphorus atom in the phosphate group (Feng et al. International Journal of Hydrogen Energy 2020, 45: 17444-17452.). In Figure S5c, the elemental mapping verifies that the elements of Co, P and O are uniformly distributed in the sample. H<sub>2</sub>-TPR profile in Figure S5d shows a peak centered at 660 °C, which corresponds to the reduction of Co<sup>3+</sup> in Co<sub>3</sub>(PO<sub>4</sub>)<sub>2</sub> to metallic Co. This result is similar to that in the previous report (Feng et al. International Journal of Hydrogen Energy 2020, 45: 17444-17452.).

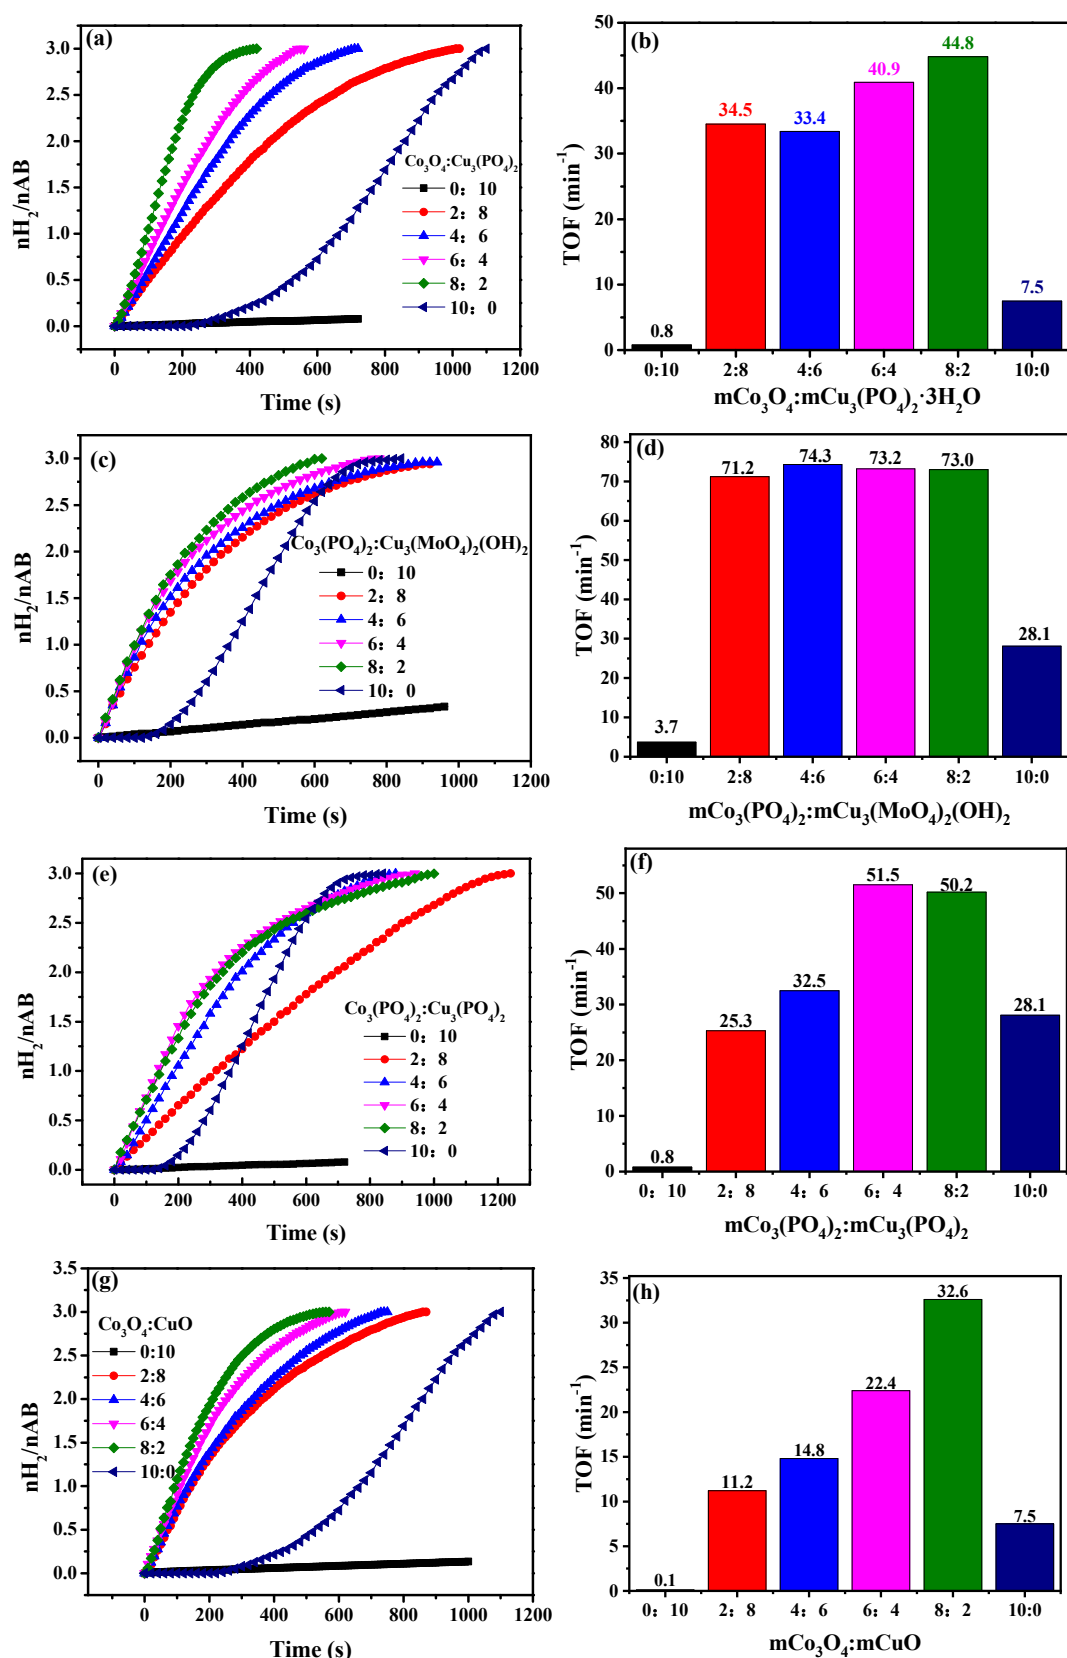

Figure S6. Catalytic performance of mixture of Co- and Cu-based catalyst with various mass ratio and the comparison of their TOF Value:  $Co_3O_4$  and  $Cu_3(PO_4)_2$  (a, b),  $Co_3(PO_4)_2$  and  $Cu_3(MoO_4)_2(OH)_2$  (c, d),  $Co_3(PO_4)_2$  and  $Cu_3(PO_4)_2$  (e, f),  $Co_3O_4$  and  $CuO$  (g, h).

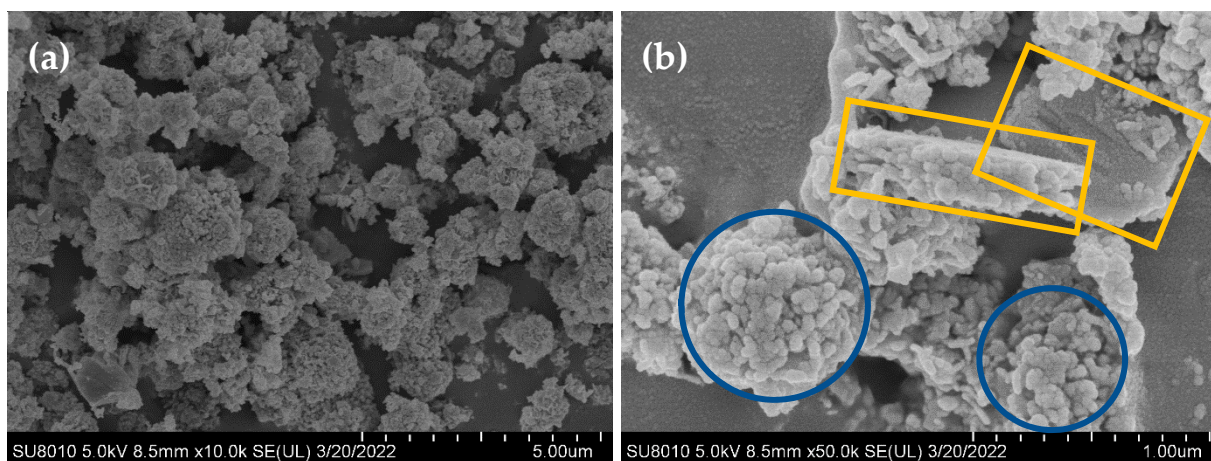

Figure S7. Low-magnification (a) and high-magnification (b) SEM images of the catalysts after 5th catalytic run. The  $\text{Co}_3\text{O}_4$  microspheres and  $\text{Cu}_3(\text{MoO}_4)_2(\text{OH})_2$  nanoplates in Figure S7b are marked with blue circles and yellow rectangles, respectively.
